# Supplementary material
Source: PubMed Central journal article supplement (PMC2737554)

**A**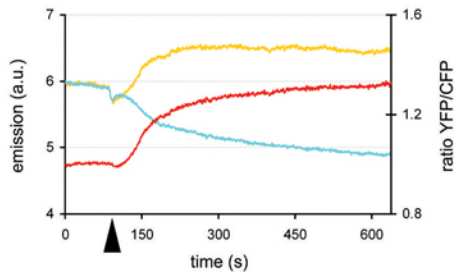**B**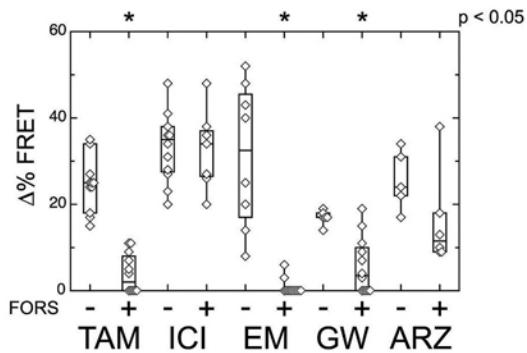**C**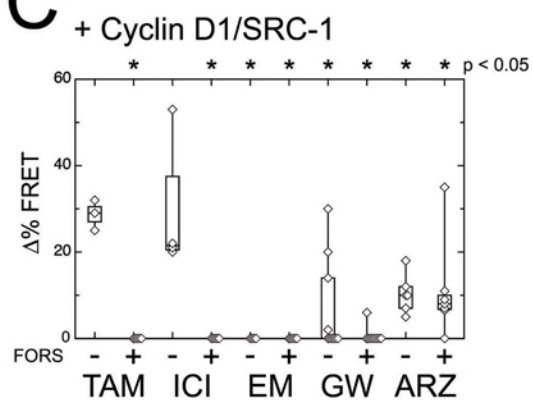

Supplement: me.2008-0268_1.pdf [file me.2008-0268_1.pdf]

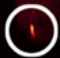

ER $\alpha$

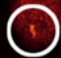

RNA Pol II

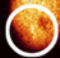

Cyclin D1

Supplement: me.2008-0268_2.pdf [file me.2008-0268_2.pdf]

# + Cyclin D1

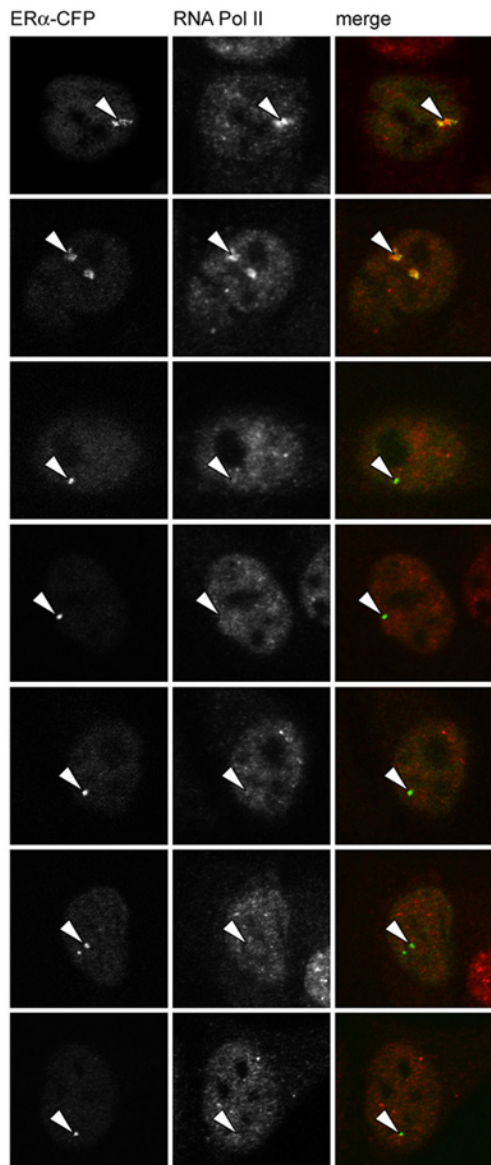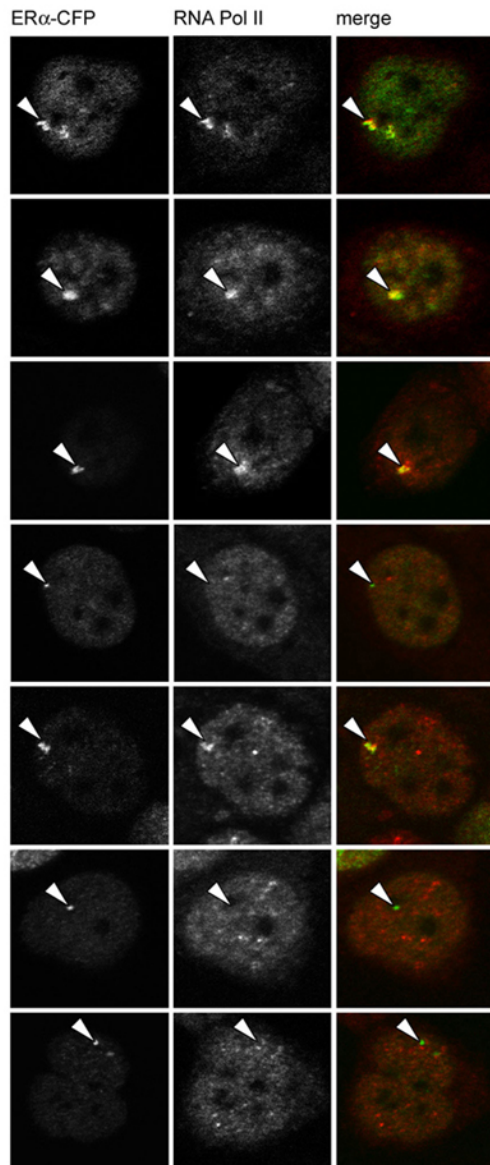

Supplement: me.2008-0268_3.pdf [file me.2008-0268_3.pdf]

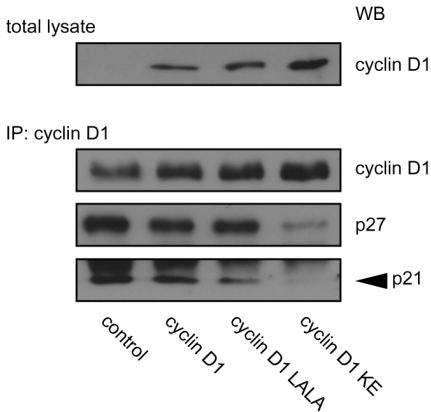

Supplement: me.2008-0268_4.pdf [file me.2008-0268_4.pdf]

A

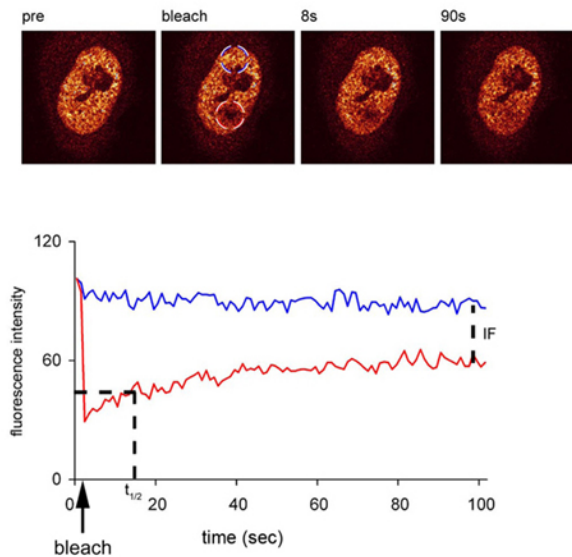

B

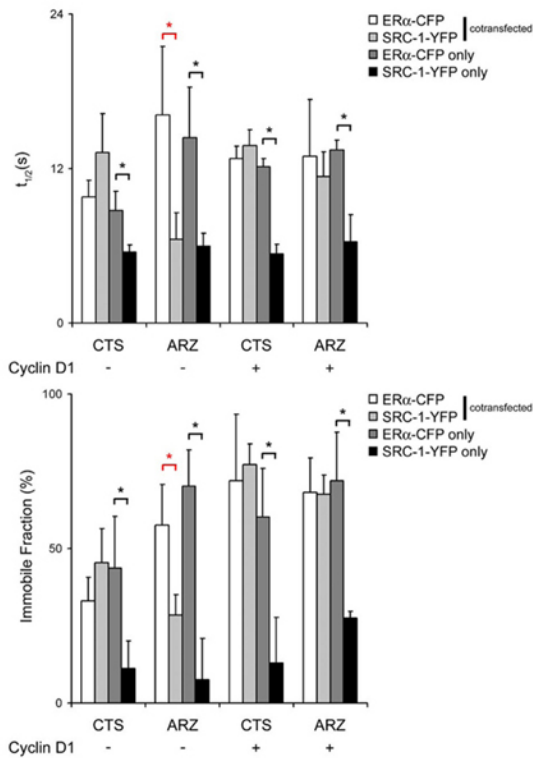

Supplement: me.2008-0268_5.pdf [file me.2008-0268_5.pdf]
